# Supplementary material
Source: publisher figshare collection journal article supplement (https://tandf.figshare.com/ndownloader/files/17490563)
Supplement: Supplementary file 1 [file 17490563]

**Supplementary Tables:**

**Comparison of demographic and clinical variables of the four distinct asthma clusters- Non significant variables**

| **Variable** | **Cluster 1** | **Cluster 2** | **Cluster 3** | **Cluster 4** | **p value** |
| --- | --- | --- | --- | --- | --- |
| Serum IgE levels  (IU/ml) | 472.7 | 591.2 | 325.0 | 681.0 | 0.0904 |
| Indoor air pollution  (%) | 20.0 | 6.2 | 10.0 | 8.3 | 0.09788 |
| Gender(%) of females | 47.5 | 43.7 | 55.0 | 75.0 | 0.1324 |
| Absolute Eosinophil count  (Cells/microliter) | 417.5 | 336.4 | 283.6 | 340.4 | 0.2257 |
| Time taken to reach maximum lung function  (Months) | 3.0 | 2.0 | 3.0 | 3.2 | 0.2753 |
| WBC counts (Cells/mm3) | 8195.8 | 8354.3 | 7757.1 | 8246.7 | 0.6196 |
| Non-Smoker (%) | 90.0 | 93.7 | 90.0 | 87.5 | 0.9368 |
